# Supplementary material
Source: Springer Nature journal article supplement (https://www.springermedizin.de/resource/supplementary/13024_2012_381_MOESM6_ESM.pdf/9643858)

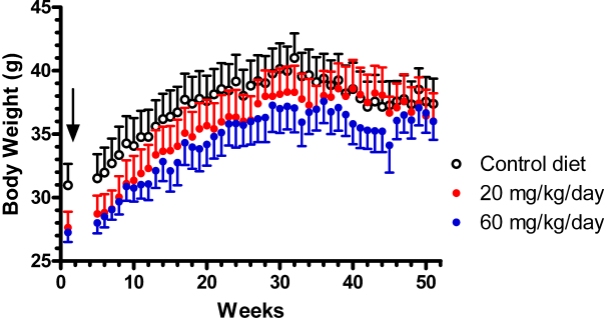

Supplement: MOESM6 [file 9643858]
